# Supplementary material for: (Ba,Sr)LaZnTaO6:Mn4+ far red emitting phosphors for plant growth LEDs: structure and photoluminescence properties
Source: Royal Society of Chemistry journal article supplement (doi:10.1039/c9nj06446j), 2020-01-01
Supplement: c9nj06446j1.pdf [file c9nj06446j1.pdf]

## Supporting Information

### **(Ba,Sr)LaZnTaO<sub>6</sub>:Mn<sup>4+</sup> far red emission phosphors for plant growth LEDs: structure and photoluminescence properties**

Dayu Huang,<sup>a,b</sup> Peipei Dang,<sup>b,c</sup> Xiao Xiao,<sup>b,c</sup> Biao Bai,<sup>b</sup> Hongzhou Lian,<sup>b,c,\*</sup> Qingguang Zeng,<sup>a,\*</sup> and Jun Lin<sup>a,b,c,\*</sup>

<sup>a</sup> *School of Applied Physics and Materials, Wuyi University, Jiangmen, Guangdong, 529020, P.*

*R. China.*

<sup>b</sup> *State Key Laboratory of Rare Earth Resource Utilization, Changchun Institute of Applied Chemistry, Chinese Academy of Sciences, Changchun 130022, P. R. China*

<sup>c</sup> *University of Science and Technology of China, Hefei 230026, P. R. China*

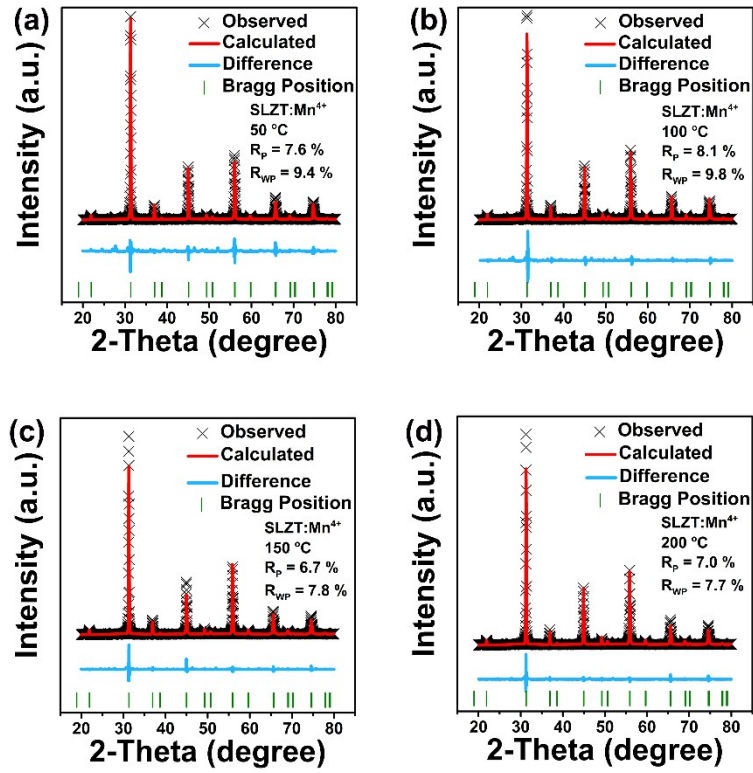

**Fig. S1** Rietveld refinement of the representative SLZT: 0.008Mn<sup>4+</sup>sample in different temperature (50-200 °C). The observed XRD data, the corresponding Rietveld refine results, the Bragg reflections and the profile difference between experimental and calculated values.

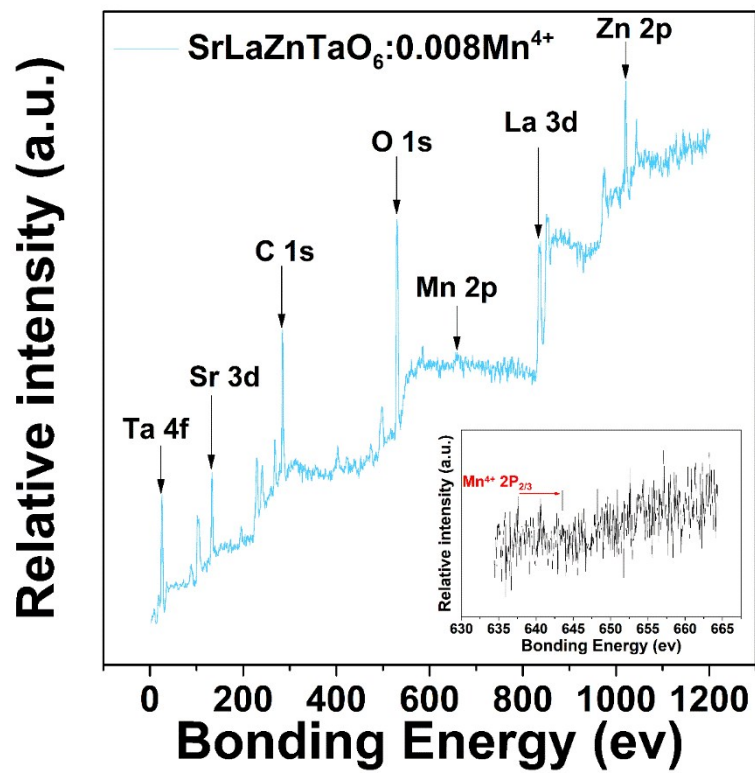

**Fig. S2** The high-resolution XPS spectra of sample  $\text{SLZT}:0.008\text{Mn}^{4+}$ , the inset is Mn 2p XPS spectrum of  $\text{SLZT}:0.008\text{Mn}^{4+}$  sample.

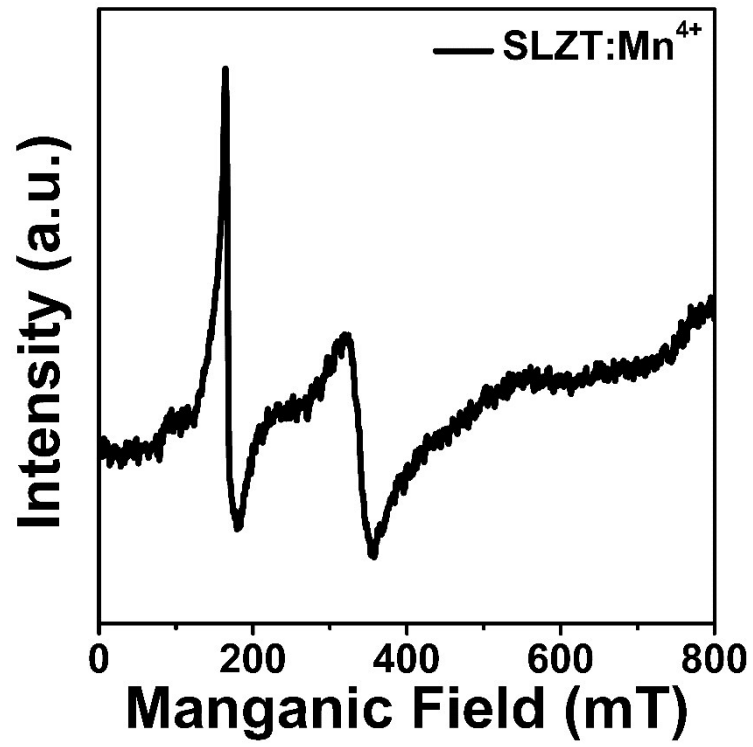

Fig. S3 The EPR spectrum of SLZT:0.008Mn<sup>4+</sup>.

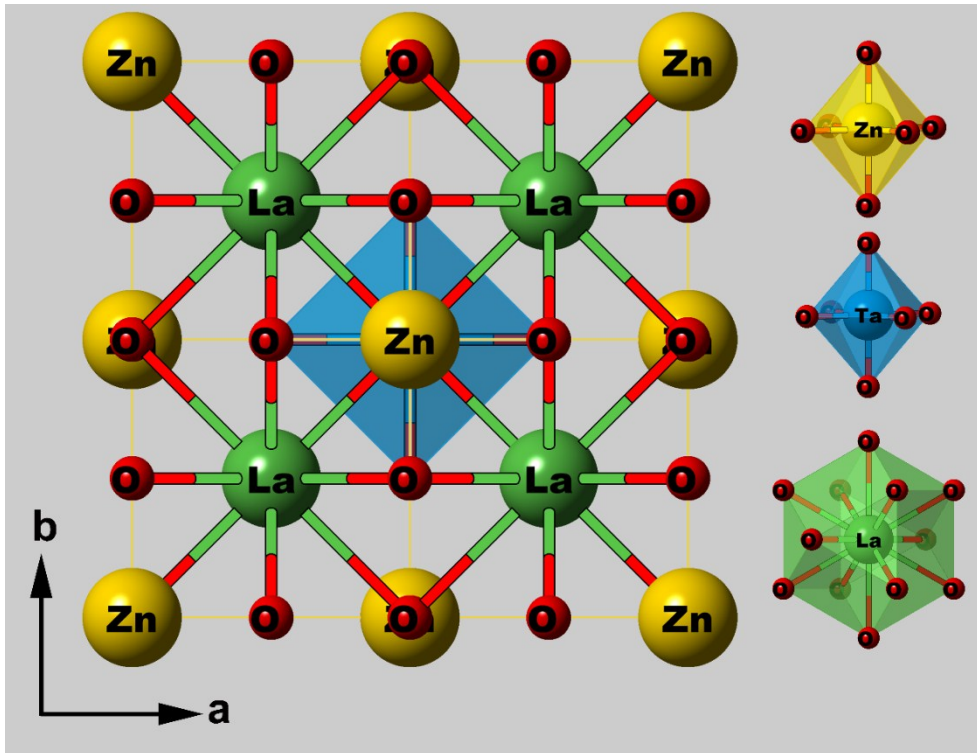

**Fig. S4** The crystal structure of BLZTO observed along the c-direction, where blue, yellow, green and red spheres stand for tantalum, zinc, lanthanum and oxygen ions, respectively.

(a)

$\lambda_{\text{ex}} = 365 \text{ nm}$

BLZT:0.008Mn<sup>4+</sup>

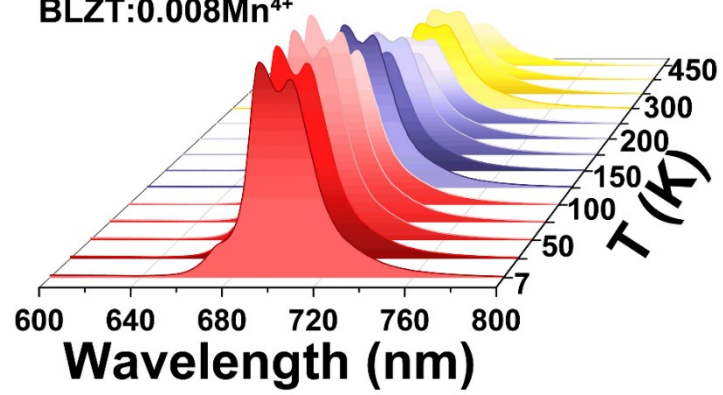

(b)

$\lambda_{\text{ex}} = 365 \text{ nm}$

SLZT:0.008Mn<sup>4+</sup>

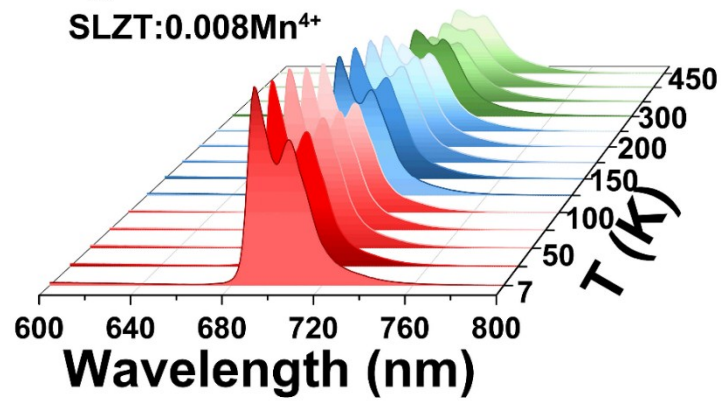

Fig. S5 Temperature-dependent PL spectra excited at 365 nm of the (a) BLZT:0.008Mn<sup>4+</sup> (b) SLZT:0.008Mn<sup>4+</sup> phosphor.
